# Supplementary material for: Glucose transporter 1-mediated glucose uptake is limiting for B-cell acute lymphoblastic leukemia anabolic metabolism and resistance to apoptosis
Source: PubMed Central journal article supplement (PMC4237255; doi:10.1038/cddis.2014.431), 2014-10-16
Supplement: cddis2014431x2.pdf [file cddis2014431x2.pdf]

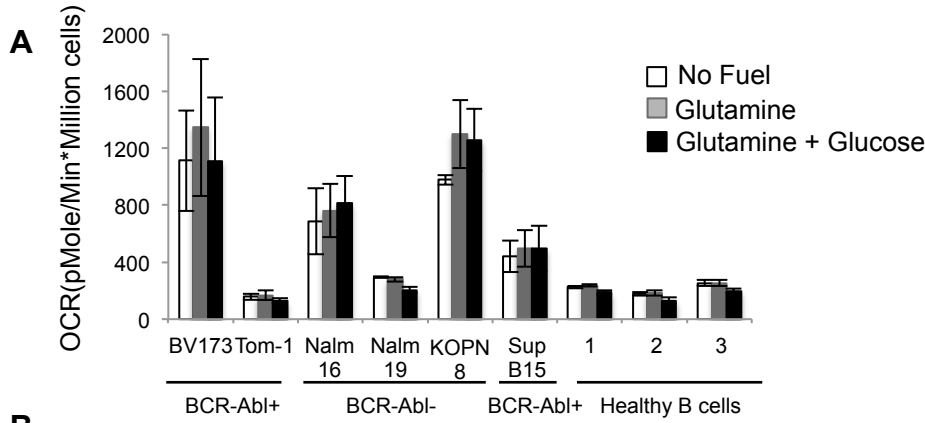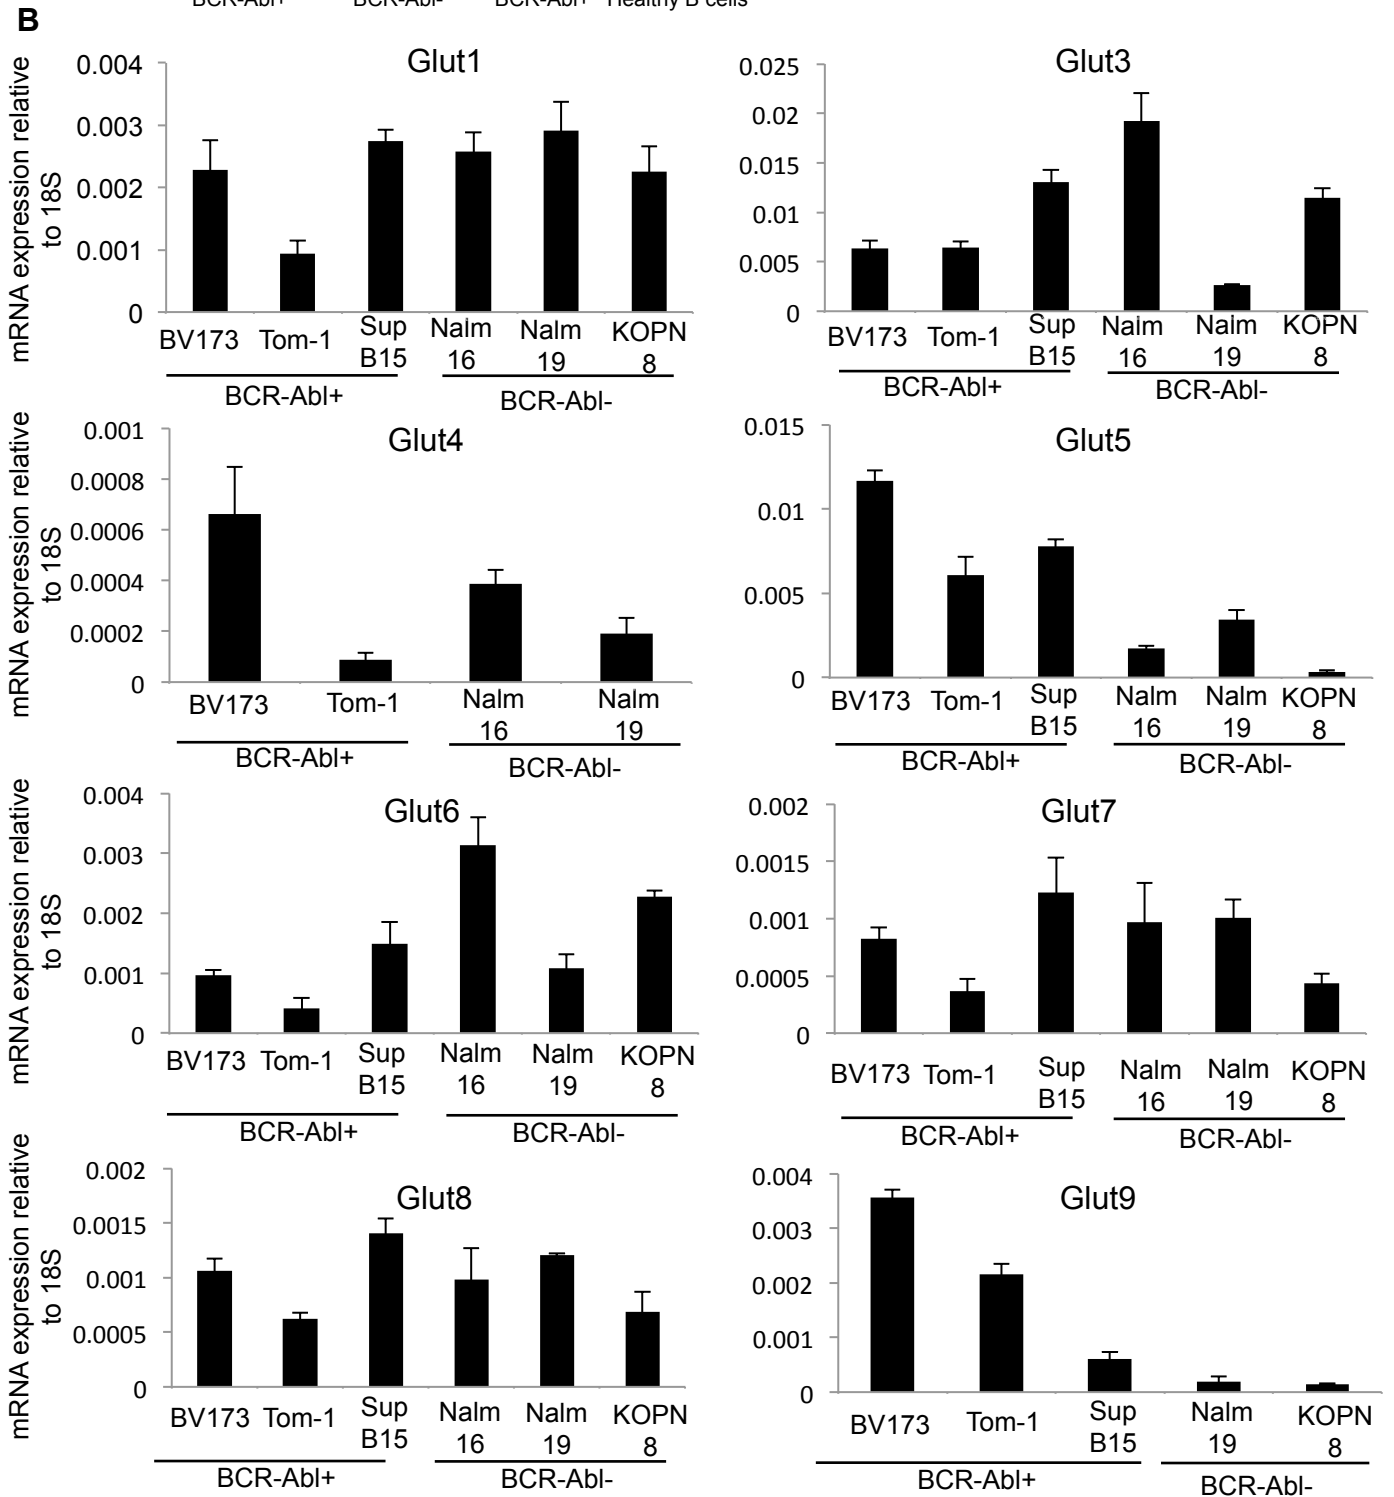

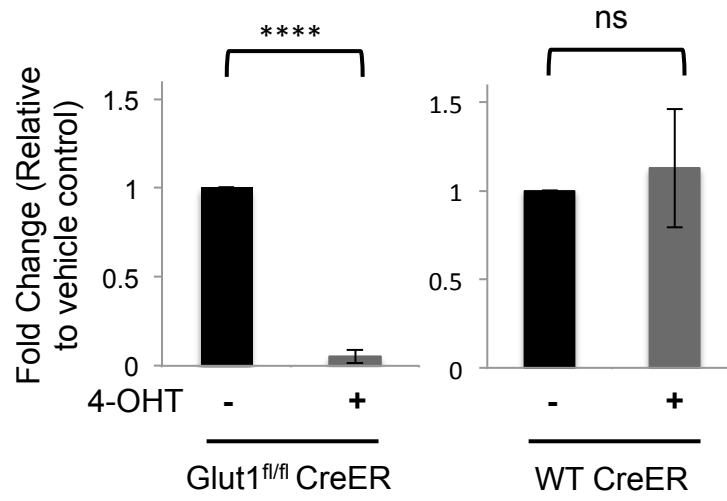

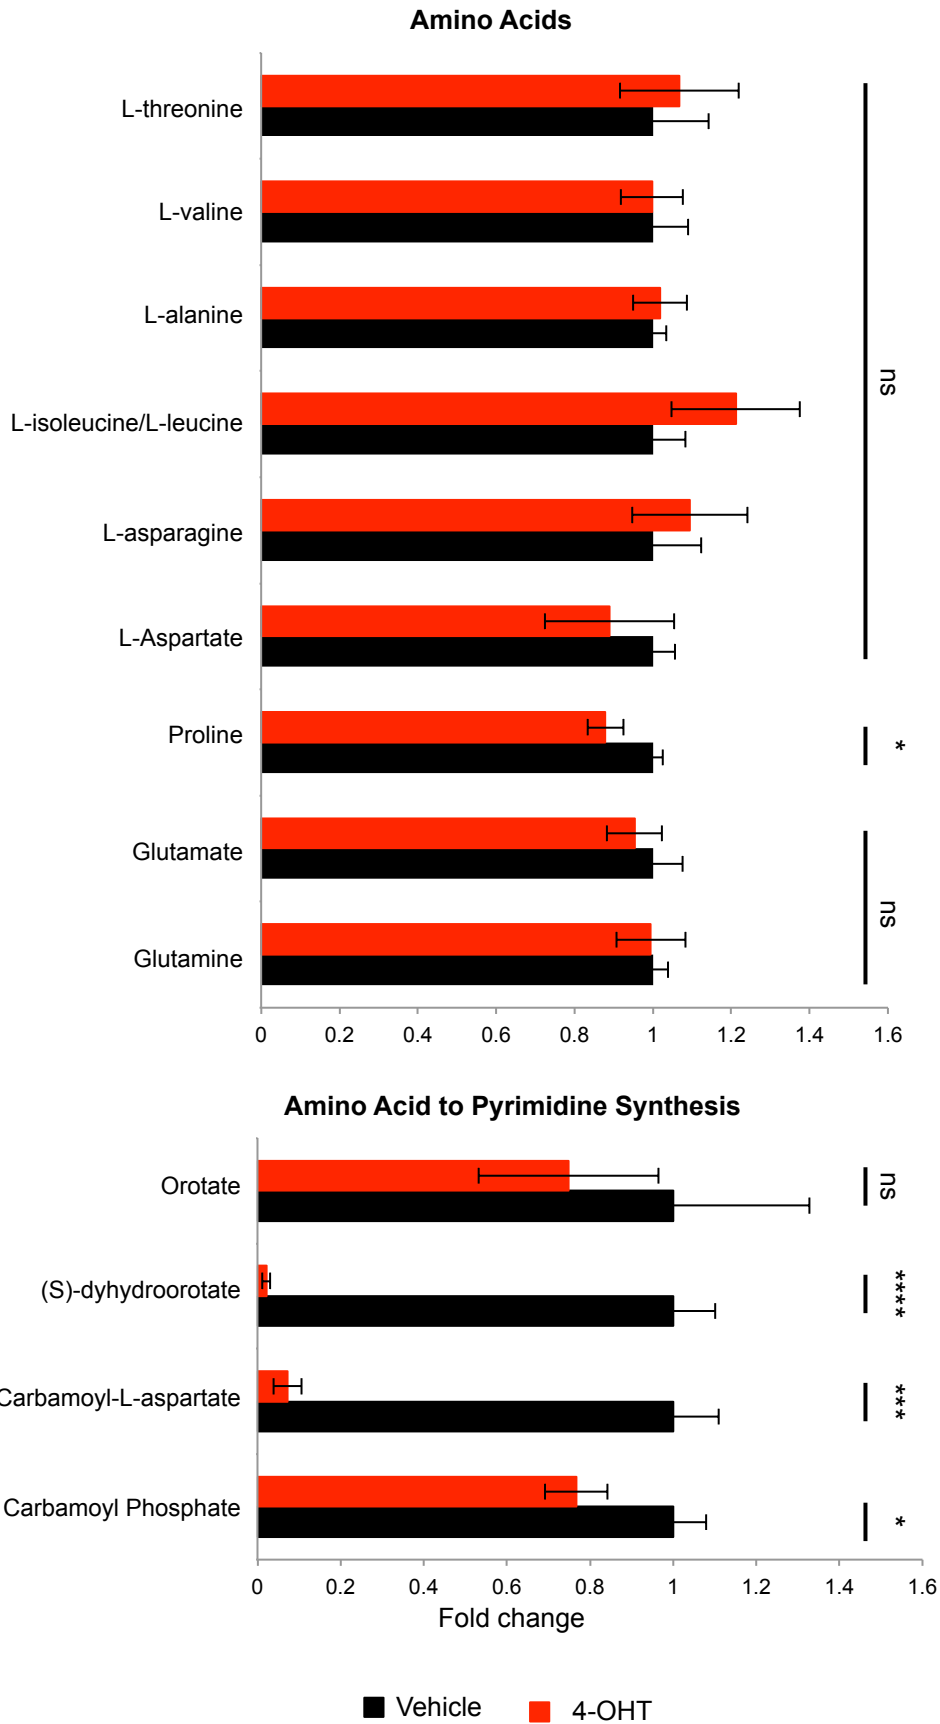

Supplemental Fig 4

■ Vehicle      ■ 4-OHT

Hexose-phosphate

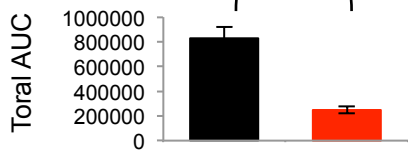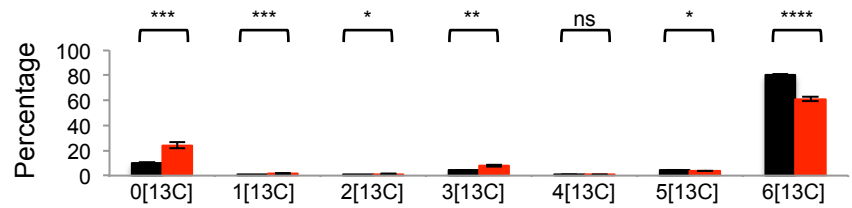

Dihydroxy-acetone-phosphate

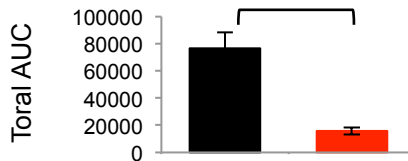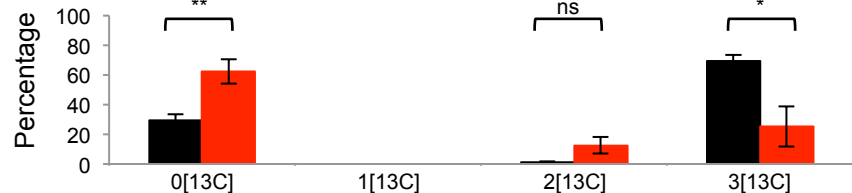

Pyruvate

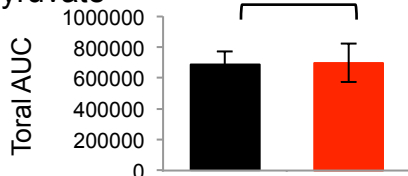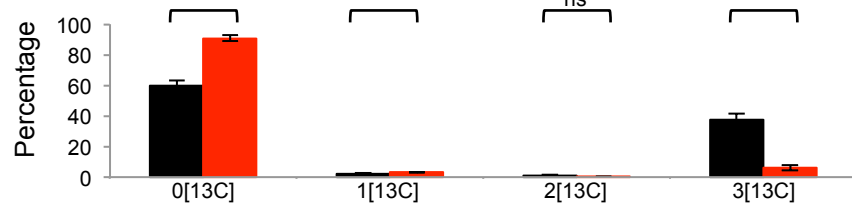

Citrate/Isocitrate

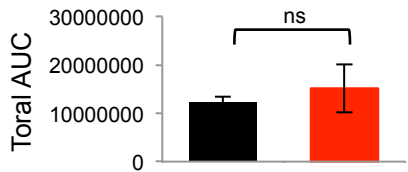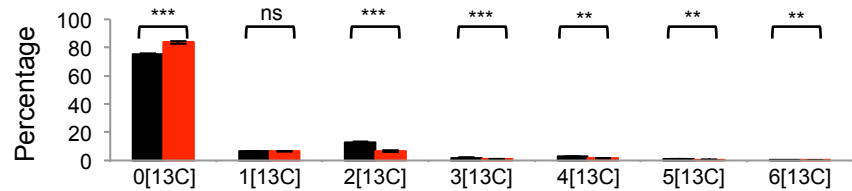

Succinate

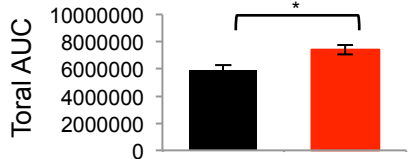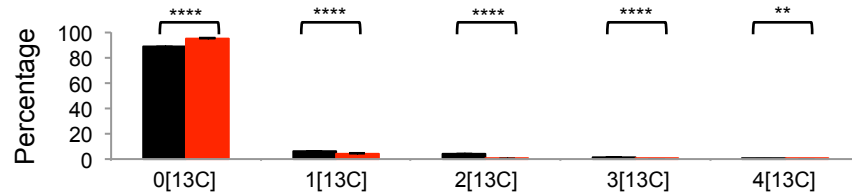

Fumarate

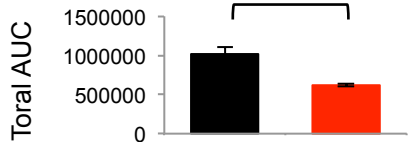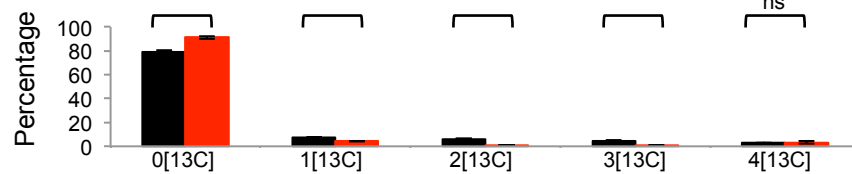

Alpha-ketoglutarate

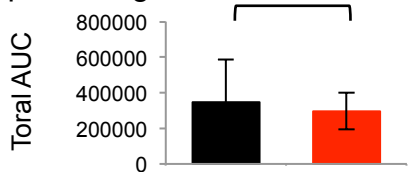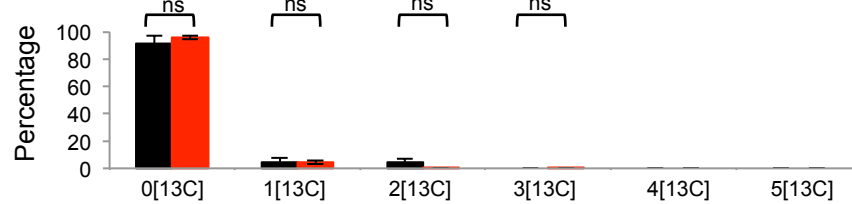

Sedoheptulose-7-phosphate

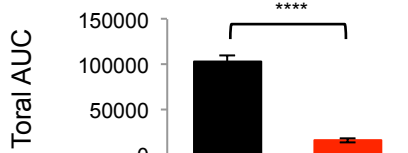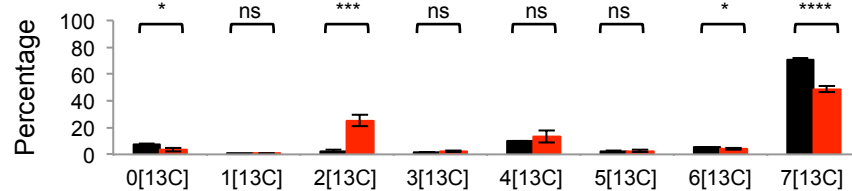

**A**

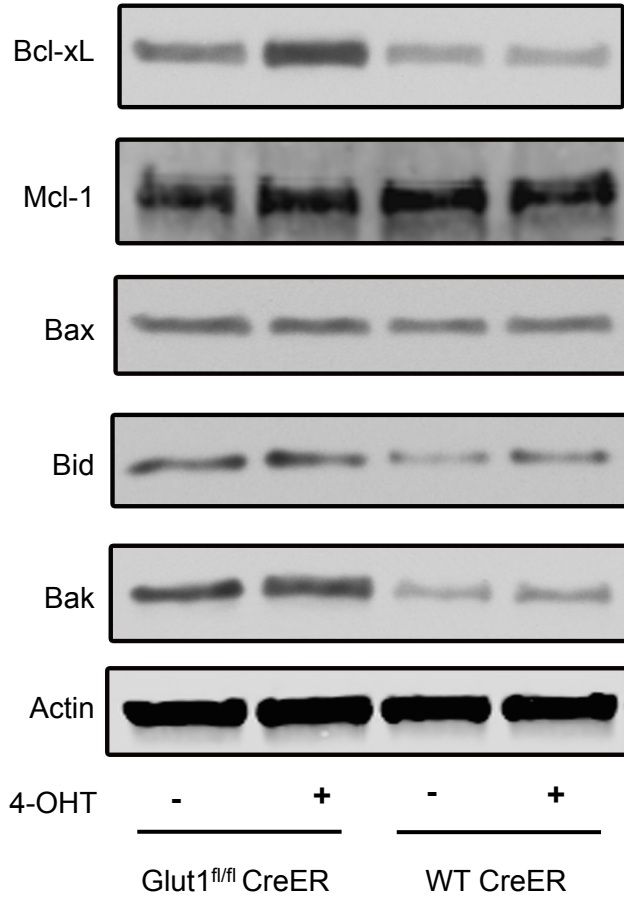

**B**

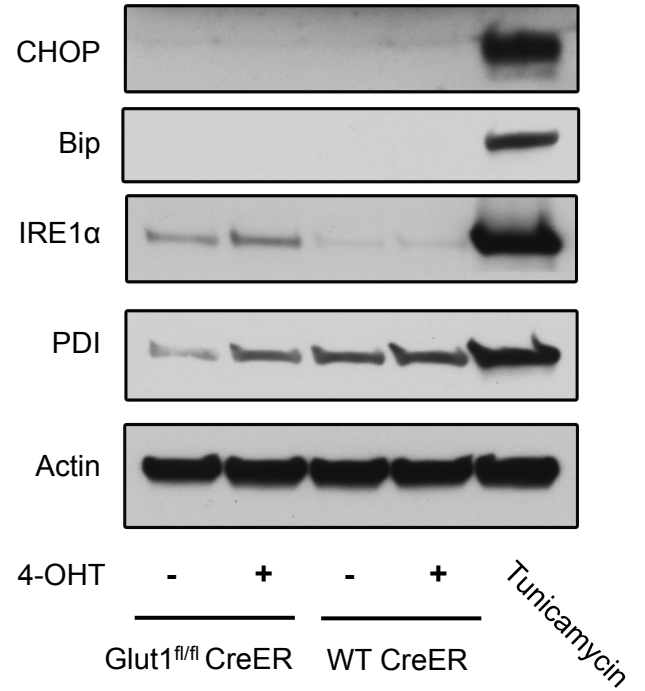

**A**

Post Glut Deletion and prior to Dasatinib addition

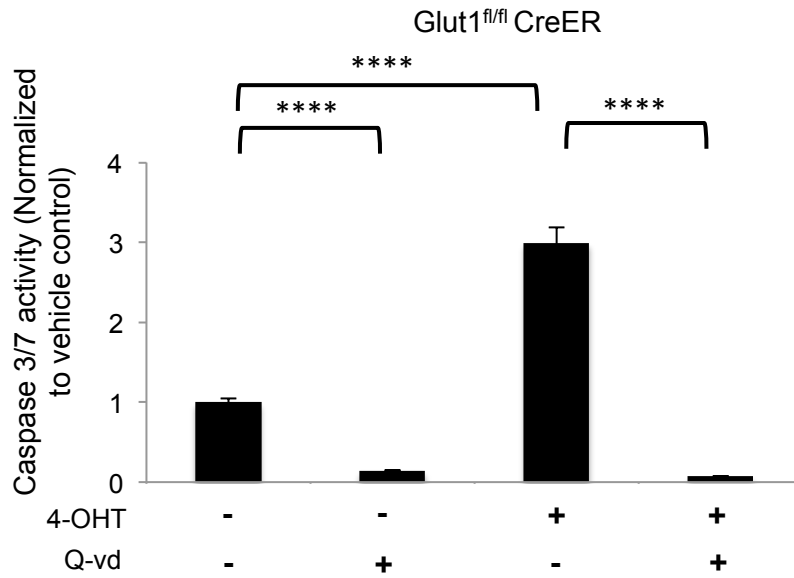

**B**

48 hours post Dasatinib addition

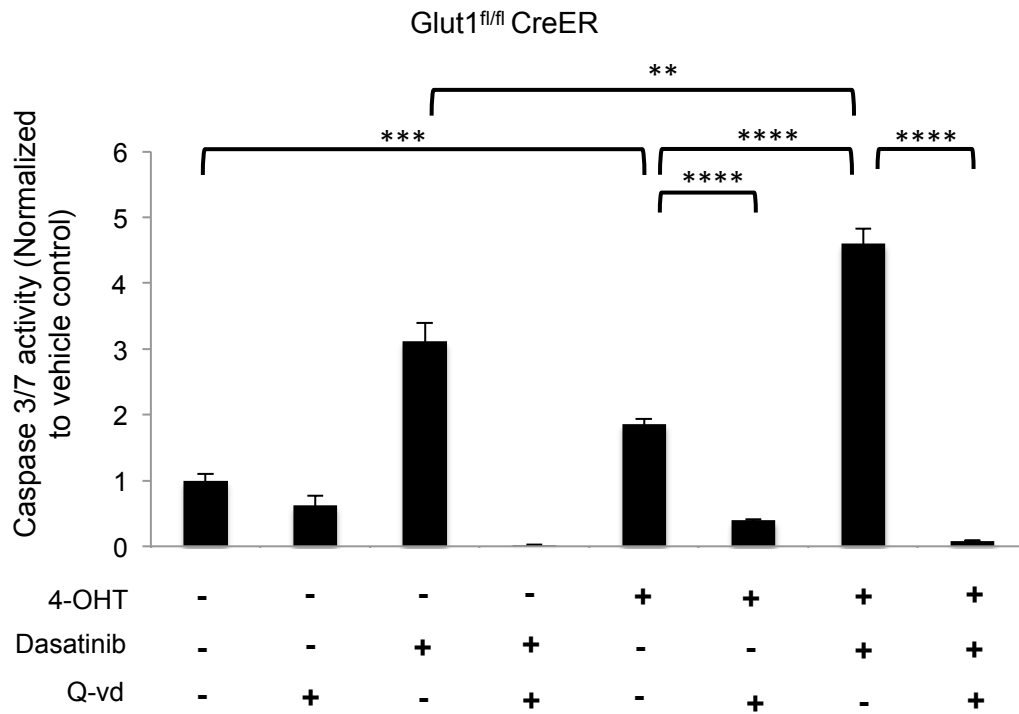

48 hours after 2-DG and Dasatinib Treatment

Supplemental Fig 7

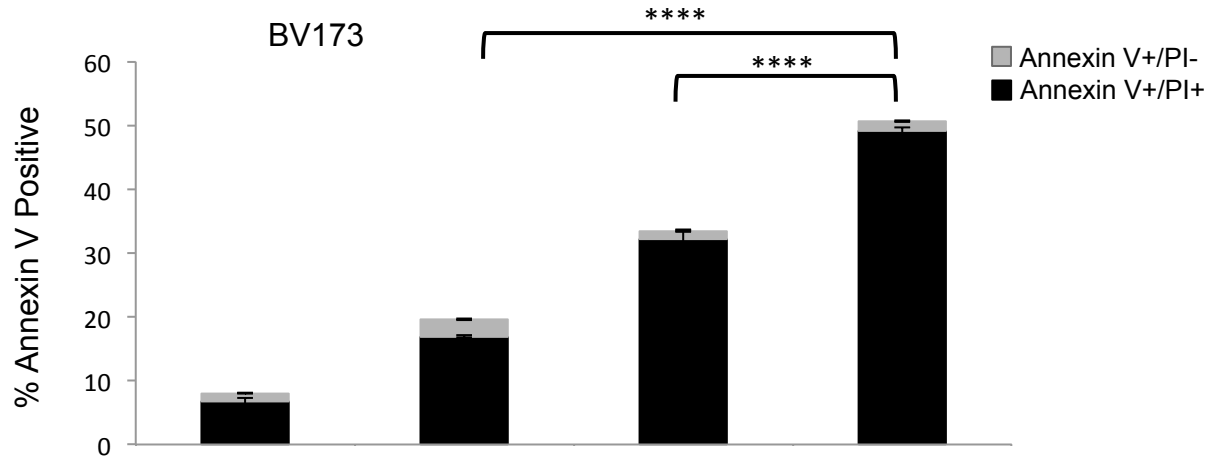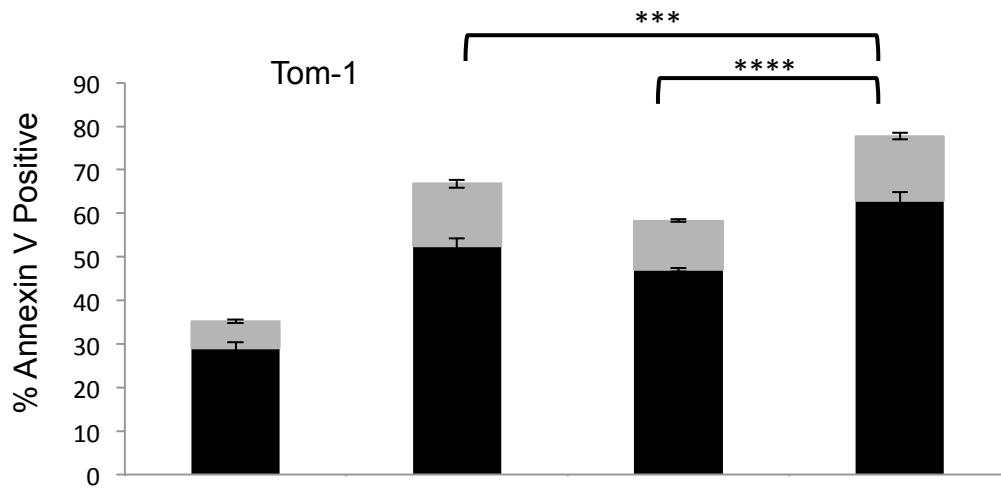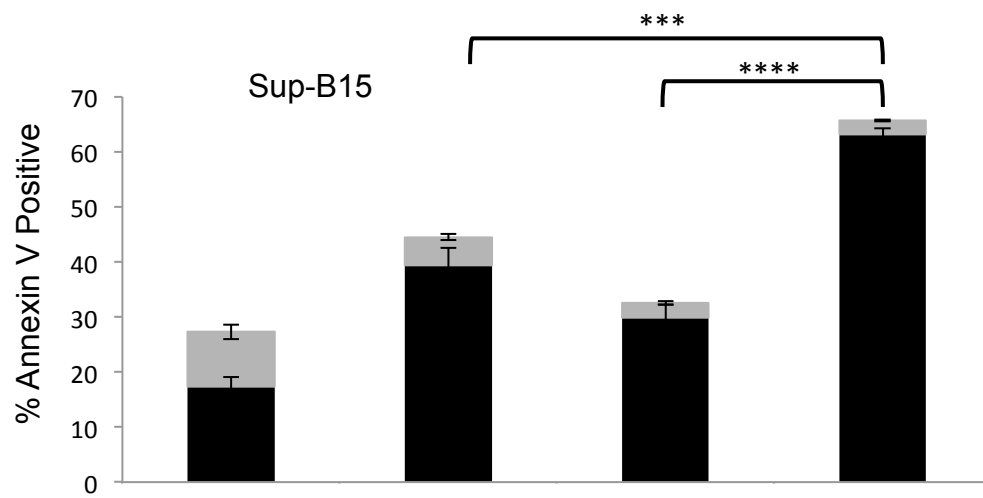

|           |   |   |   |   |
|-----------|---|---|---|---|
| 2-DG      | - | + | - | + |
| Dasatinib | - | - | + | + |
