# Supplementary material for: Glucose transporter 1-mediated glucose uptake is limiting for B-cell acute lymphoblastic leukemia anabolic metabolism and resistance to apoptosis
Source: PubMed Central journal article supplement (PMC4237255; doi:10.1038/cddis.2014.431), 2014-10-16
Supplement: cddis2014431x3.pdf [file cddis2014431x3.pdf]

|                           |            |            |            |            |            |            |            |            |            |            |            |            |
|---------------------------|------------|------------|------------|------------|------------|------------|------------|------------|------------|------------|------------|------------|
| glyoxylate                | 404086.825 | 400170.72  | 444257.48  | 395065.96  | 435599.643 | 418612.157 | 347761.239 | 359312.4   | 359593.106 | 343711.148 | 374994.283 | 422246.769 |
| ethamp[c]                 | 26392.9946 | 21479.2136 | 21838.7263 | 19483.6763 | 18510.5818 | 22980.6976 | 95189.4113 | 90304.6455 | 100387.735 | 2335917.39 | 2107169.43 | 2074404.82 |
| L-cysteate(1-)            | 4215.80645 | 2558.73895 | 1181.9282  | 2058.2164  | 2770.35265 | 4827.4012  | 1420.08675 | 1073.4661  | 1971.89045 | 8258.55245 | 1727.49075 | 3520.04835 |
| Oxaloacetate              | 32256.4369 | 38926.8138 | 26140.3996 | 31941.3841 | 36680.2198 | 49042.6006 | 132136.475 | 15552.7595 | 118430.116 | 874752.015 | 99711.0559 | 40517.2635 |
| Picolinic acid/Nicotinate | 123682.156 | 157167.213 | 174379.47  | 132046.84  | 168209.866 | 171804.175 | 113951.012 | 140100.427 | 157021.271 | 127622.125 | 158945.487 | 183308.342 |
| D-glucarate(2-)           | 19833.9701 | 19627.2497 | 21332.0023 | 18736.8354 | 27961.0356 | 30216.7444 | 23407.2344 | 18374.7885 | 20336.0123 | 23854.5598 | 21747.6816 | 34764.3178 |
| Deoxyinosine              | 32821.0228 | 32320.6776 | 30390.0977 | 25693.2068 | 25176.4325 | 42967.6195 | 18215.9462 | 17874.5362 | 18003.6693 | 48023.8202 | 32545.4544 | 12054.6788 |
| dCTP                      | 24829.0283 | 23971.8719 | 13149.9837 | 24561.4466 | 27804.7148 | 36532.4849 | 53057.2488 | 43360.8934 | 37964.0991 | 8413.2175  | 14636.0052 | 2463.1998  |
| pyruvate                  | 5893322.11 | 6902886.63 | 5168727.89 | 4029427.59 | 5889936.5  | 5309917.84 | 5184647.25 | 8759642.96 | 6670761.96 | 7791412.79 | 6871552.75 | 8582751.29 |
| sarcosine                 | 773292.959 | 874920.277 | 901747.309 | 797597.217 | 876536.745 | 961492.065 | 626895.959 | 773744.499 | 805766.851 | 683266.977 | 802154.629 | 841417.422 |
| (R,s)-lactate             | 441701208  | 475556721  | 489075472  | 457220925  | 486847855  | 522307409  | 304723230  | 341957612  | 320557659  | 207337985  | 251140500  | 274831949  |
| acetoacetate              | 465274.353 | 811034.494 | 674108.52  | 511926.145 | 784789.049 | 789487.09  | 662317.139 | 703699.561 | 942084.26  | 1966382.67 | 970778.248 | 686595.681 |
| L-glutamate(1-)           | 66678914.5 | 64557832.1 | 58366742   | 52829073.2 | 51845721.5 | 62847056.4 | 54100364.4 | 51081829.5 | 46496966.9 | 44121393.9 | 49386110.6 | 51009466   |
| D-glucose                 | 23349814.4 | 21695761.9 | 26054596.8 | 24083966.3 | 26860860.9 | 25279968   | 16805508   | 20686205.2 | 17260328.9 | 20416971.1 | 24142804.8 | 29122028.6 |
| myo-inositol              | 2295637.44 | 2118661.18 | 2652003.91 | 2331077.15 | 2382282.08 | 2441905.1  | 1496152.86 | 1878484.75 | 1504909.6  | 1809838.57 | 2175100.94 | 2636477.08 |
| uridine                   | 7381720.22 | 6233810.46 | 4268749.29 | 5009559.05 | 4318868.72 | 6951666.92 | 4053072.51 | 4026946.16 | 3853726.81 | 4934308.37 | 6815122.57 | 5506112.06 |
| uracil                    | 470983.932 | 460290.669 | 494843.293 | 434667.55  | 470997.458 | 447013.281 | 342182.079 | 412029.722 | 354572.194 | 329613.158 | 436377.203 | 498619.421 |
| Fumarate                  | 5222040.06 | 5301518.11 | 5123087.26 | 4786024.09 | 4691156.44 | 5143056.75 | 5484124.59 | 4838351.9  | 5144588.78 | 3584048.91 | 3727292.32 | 4211937.6  |
| L-aspartate(1-)           | 16394321.2 | 15166761   | 14847042.1 | 12848830.9 | 12731363.4 | 13849074.1 | 9993615.17 | 9844253.96 | 8974189.23 | 7377958.78 | 7899744.14 | 10344143   |
| L-ascorbate               | 393170.33  | 422174.053 | 492800.016 | 565809.257 | 461260.199 | 505595.52  | 482408.203 | 295141.335 | 351892.422 | 1036322.52 | 348593.986 | 334765.952 |
| glycine                   | 3495125.86 | 3111909    | 3216985.93 | 3008303    | 3397380.51 | 3540832.83 | 2540908.58 | 2646096.41 | 2483863.59 | 3180417.38 | 3509471.67 | 5527334.84 |
| succinate(2-)             | 10080860.1 | 10289107.8 | 9704497.43 | 8136586.26 | 8922022.18 | 10801257   | 8313352.17 | 7767346.14 | 8391435.38 | 7832492.44 | 7295505.84 | 8859583.75 |
| Dihydroxyacetone phosph:  | 425824.727 | 448719.046 | 384630.945 | 378921.222 | 414831.107 | 385908.214 | 549517.098 | 640539.441 | 501454.944 | 273456.495 | 448812.748 | 346726.493 |
| Phosphoenolpyruvate       | 91557.7837 | 105562.495 | 76776.9065 | 107521.766 | 96760.6749 | 106785.098 | 329759.098 | 238690.726 | 240291.746 | 66921.5352 | 137544.39  | 44626.5652 |
| IMP                       | 167624.758 | 137464.05  | 98541.6241 | 117733.139 | 105538.312 | 157960.346 | 140194.176 | 113699.486 | 113960.844 | 158863.535 | 119643.669 | 145466.064 |
| inosine                   | 1430.79415 | 2022.853   | 2494.3676  | 1758.1109  | 2007.126   | 1254.196   | 1852.6703  | 2258.0995  | 2025.0301  | 1166.6335  | 2105.0702  | 1869.14305 |
