# Supplementary material for: Glucose transporter 1-mediated glucose uptake is limiting for B-cell acute lymphoblastic leukemia anabolic metabolism and resistance to apoptosis
Source: PubMed Central journal article supplement (PMC4237255; doi:10.1038/cddis.2014.431), 2014-10-16
Supplement: cddis2014431x4.pdf [file cddis2014431x4.pdf]

Table with 13 columns representing different chemical components and 14 rows representing various chemical structures such as 1[13C]D-gluconate, 2[13C]D-gluconate, etc. Each cell contains a numerical value representing a specific property or measurement for that component and structure.
